# Supplementary material for: Evaluating the utility of early laboratory monitoring of antiretroviral-induced haematological and hepatic toxicity in HIV-infected persons in Cameroon
Source: PubMed Central journal article supplement (PMC4262146; doi:10.1186/1471-2334-14-519), 2014-09-25

■ Before ART    □ After two weeks on ART

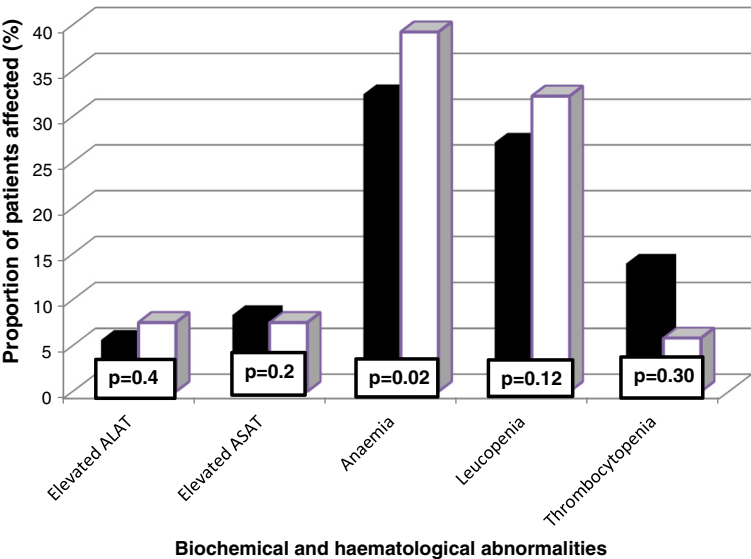

Supplement: 12879_2014_3840_MOESM3_ESM.pdf [file 12879_2014_3840_MOESM3_ESM.pdf]
